# Supplementary material
Source: HighWire-hosted journal article supplement (https://www.canjsurg.ca/content/suppl/2021/08/27/63.6.E527)
Supplement: cjs-016520-1-at.pdf [file cjs-016520-1-at.pdf]

**Appendix 1** to Rozario D, Rozario N. Can machine learning optimize the efficiency of the operating room in the era of COVID19? *Can J Surg* 2020.

DOI: 10.1503/cjs.016520

Copyright © 2020 The Author(s) or their employer(s).

To receive this resource in an accessible format, please contact us at [cmajgroup@cmaj.ca](mailto:cmajgroup@cmaj.ca).

*Online appendices are unedited and posted as supplied by the authors.*

*The following information is a python code script which can be used to replicate the findings.*

```
# Natasha Rozario
# This script reads data from an excel file about past procedures and the times they took, and
# uses google's or-tools
# to calculate scheduling times for each procedure type that minimizes the undertime and
# overtime frequencies of
# the operating room as a whole

from __future__ import print_function
from ortools.sat.python import cp_model
import pandas as pd
import sys
import math

#
=====
# Parameters
targetOvertimeFrequency = 0.2
targetUndertimeFrequency = 0
undertimeCostWeight = 1
overtimeCostWeight = 1

arguments = sys.argv
excelInputFile = 'input.xlsx'
excelOutputFile = 'output.xlsx'

overtimeBlockLength = 15 # length of overtime blocks in minutes
noOfNursesPerBlock = 2.5 # number of nurses per overtime block
overtimeSalary = 75 # pay by block for overtime nurses

# Optional: get excel filenames from command line argument
if (len(arguments) > 1):
    excelInputFile = str(arguments[1])
    excelOutputFile = str(arguments[2])

# Read data from an excel file
data = pd.read_excel(r'' + excelInputFile, header=4)
# -----
# Input data from excel sheet columns

dfP = pd.DataFrame(data, columns=["Procedure"])
dfP = dfP.iloc[:, :].values.tolist()
dfP = [x for y in dfP for x in y]
```

**Appendix 1** to Rozario D, Rozario N. Can machine learning optimize the efficiency of the operating room in the era of COVID19? *Can J Surg* 2020.

DOI: 10.1503/cjs.016520

*Online appendices are unedited and posted as supplied by the authors.*

```
dfD = pd.DataFrame(data, columns=["Date"])
```

```
dfD = dfD.get_values()
```

```
dfD = [x for y in dfD for x in y]
```

```
dfE = pd.DataFrame(data, columns=["Book Dur"])
```

```
dfE = dfE.iloc[:, :].values.tolist()
```

```
dfE = [x for y in dfE for x in y]
```

```
dfA = pd.DataFrame(data, columns=["Actual Dur"])
```

```
dfA = dfA.iloc[:, :].values.tolist()
```

```
dfA = [x for y in dfA for x in y]
```

```
rawProcedures = [] # a list of each procedure performed
```

```
procedureTypes = [] # a list of all the procedure codes
```

```
rawDays = [] # a list of dates for each procedure performed
```

```
days = [] # a list of the dates in the data
```

```
rawExpectedTimes = [] # a list of scheduled times for each procedure performed
```

```
rawActualTimes = [] # a list of actual times for each procedure performed
```

```
# Input data into arrays
```

```
for i in range(len(dfE)):
```

```
    if str(dfE[i]) != 'nan':
```

```
        if dfD[i] not in days:
```

```
            days.append(dfD[i])
```

```
            rawExpectedTimes.append(dfE[i])
```

```
            rawDays.append(dfD[i])
```

```
            rawActualTimes.append(dfA[i])
```

```
            rawProcedures.append(dfP[i])
```

```
            if dfP[i] not in procedureTypes:
```

```
                procedureTypes.append(dfP[i])
```

```
procedureTypes.sort() # sort procedure types alphabetically
```

```
proceduresPerDay = {w: [] for w in days} # a map from a day to a list of procedures  
performed on that day
```

```
for i in range(len(rawDays)):
```

```
    proceduresPerDay[rawDays[i]].append(rawProcedures[i])
```

```
expectedTimes = {w: [] for w in days} # a map from a day to a list of booking times for that  
day
```

```
for i in range(len(rawDays)):
```

```
    expectedTimes[rawDays[i]].append(rawExpectedTimes[i])
```

```
actualTimes = {w: [] for w in days} # a map from a day to a list of actual procedure times for  
that day
```

```
for i in range(len(rawDays)):
```

**Appendix 1** to Rozario D, Rozario N. Can machine learning optimize the efficiency of the operating room in the era of COVID19? *Can J Surg* 2020.

DOI: 10.1503/cjs.016520

*Online appendices are unedited and posted as supplied by the authors.*

```
actualTimes[rawDays[i]].append(rawActualTimes[i])

# -----
# Pre-processing

originalBookTimes = {p: 0 for p in procedureTypes} # a map with average booking times for
each procedue
for p in procedureTypes:
    counter = 0
    for i in range(len(rawDays)):
        if p == rawProcedures[i]:
            counter += 1
            originalBookTimes[p] += rawExpectedTimes[i]
    originalBookTimes[p] = int(originalBookTimes[p] / counter)

expectedTotalTime = {} # a map from a day to the sum of booking times for that day
for day in days:
    expectedTotalTime[day] = 0
    for time in expectedTimes[day]:
        expectedTotalTime[day] += time

actualTotalTime = {} # a map from a day to the sum of actual procedure times for that day
for day in days:
    actualTotalTime[day] = 0
    for time in actualTimes[day]:
        actualTotalTime[day] += time

currentOvertimeCount = 0 # counts how many days the room went overtime
currentUndertimeCount = 0 # counts how many days the room went undertime
for day in days:
    if expectedTotalTime[day] + 0 < actualTotalTime[day]:
        currentOvertimeCount += 1
    elif actualTotalTime[day] + 15 < expectedTotalTime[day]:
        currentUndertimeCount += 1

minProcedureTime = {p: 1440 for p in procedureTypes} # a map from a procedure to its
minimum case time
maxProcedureTime = {p: 0 for p in procedureTypes} # a map from a procedure to its
maximum case time

for i in range(len(rawDays)):
    if rawActualTimes[i] < minProcedureTime[rawProcedures[i]]:
        minProcedureTime[rawProcedures[i]] = rawActualTimes[i]
    if rawActualTimes[i] > maxProcedureTime[rawProcedures[i]]:
        maxProcedureTime[rawProcedures[i]] = rawActualTimes[i]

count = len(days) # number of days
```

**Appendix 1** to Rozario D, Rozario N. Can machine learning optimize the efficiency of the operating room in the era of COVID19? *Can J Surg* 2020.

DOI: 10.1503/cjs.016520

*Online appendices are unedited and posted as supplied by the authors.*

```
#
=====
=====
# Model

print("Starting model optimisation", file=sys.stderr)

# Decision variables
model = cp_model.CpModel() # Create the model

procedureSchedulingTimes = {} # Create a decision variable for the scheduling time of each
procedure type
for p in procedureTypes:
    procedureSchedulingTimes[p] = model.NewIntVar(int(minProcedureTime[p]),
int(maxProcedureTime[p]),
                "procedureSchedulingTime" + str(p))

totalScheduledTime = {} # The total time scheduled for each day
overtimeTriggers = {} # Set to 1 if overtime for each day
undertimeTriggers = {} # Set to 1 if undertime for each day
for day in days:
    totalScheduledTime[day] = model.NewIntVar(0, 1000, "day" + str(day))
    overtimeTriggers[day] = model.NewIntVar(0, 1, "overtimeTrigger" + str(day))
    undertimeTriggers[day] = model.NewIntVar(0, 1, "undertimeTrigger" + str(day))

overtimeCount = model.NewIntVar(0, 1000, "overtimeCount") # Number of days that went
overtime
undertimeCount = model.NewIntVar(0, 1000, "undertimeCount") # Number of days that went
undertime
overtimeCost = model.NewIntVar(-1000, 1000, "overtimeCost") # Overtime cost
undertimeCost = model.NewIntVar(-1000, 1000, "undertimeCost") # Undertime cost
absOvertimeCost = model.NewIntVar(0, 100, "absOvertimeCost") # |overtime cost|
absUndertimeCost = model.NewIntVar(0, 100, "absUndertimeCost") # |undertime cost|
finalCost = model.NewIntVar(0, 100, "finalCost") # final cost is sum of overtime and
undertime costs

# -----
# Constraints
for day in days:
    # set totalScheduledTime to the sum of scheduled time in a day
    model.Add(totalScheduledTime[day] == (sum(procedureSchedulingTimes[i] for i in
proceduresPerDay[day])))

    # set overtime trigger to 1 if overtime
    model.Add(1000 * overtimeTriggers[day] >= int(actualTotalTime[day]) -
totalScheduledTime[day] - 0 - 1)
```

**Appendix 1** to Rozario D, Rozario N. Can machine learning optimize the efficiency of the operating room in the era of COVID19? *Can J Surg* 2020.

DOI: 10.1503/cjs.016520

*Online appendices are unedited and posted as supplied by the authors.*

```
# set overtime trigger to 0 if not overtime
model.Add(1500 * (1 - overtimeTriggers[day]) >= totalScheduledTime[day] -
int(actualTotalTime[day]) + 0)

# set undertime trigger to 1 if undertime
model.Add(1000 * undertimeTriggers[day] >= totalScheduledTime[day] - 15 -
int(actualTotalTime[day]) - 1)
# set undertime trigger to 0 if not undertime
model.Add(1000 * (1 - undertimeTriggers[day]) >= int(actualTotalTime[day]) -
totalScheduledTime[day] + 15)

model.Add(overtimeCount == (sum(overtimeTriggers[day] for day in days))) # count how
many days went overtime
model.Add(undertimeCount == (sum(undertimeTriggers[day] for day in days))) # count how
many days went undertime

model.Add((overtimeCost == overtimeCount - int(count * targetOvertimeFrequency))) #
calculate overtime cost
model.Add((undertimeCost == undertimeCount - int(count * targetUndertimeFrequency))) #
calculate undertime cost

# calculate absolute value of overtime cost
model.AddAbsEquality(absOvertimeCost, int(overtimeCostWeight) * overtimeCost)
# calculate absolute value of undertime cost
model.AddAbsEquality(absUndertimeCost, int(undertimeCostWeight) * undertimeCost)
model.Add((finalCost == overtimeCost + undertimeCost)) # calculate final cost

model.Minimize(finalCost) # Objective is to minimize final cost

solver = cp_model.CpSolver()
print("Starting to solve", file=sys.stderr)
status = solver.Solve(model)

#
=====
# Print output to console and excel sheet
if status == cp_model.OPTIMAL or status == cp_model.FEASIBLE:
    print("Success!")
    rows = ["Number of days", "Number of cases", "Original overtime frequency", "Original
undertime frequency", "Model overtime frequency",
            "Model undertime frequency", "Model cases achieved", "Original Overtime Minutes
Used", "Model Overtime Minutes Used",
            "Original Overtime Cost", "Model Overtime Cost", "Original OR minutes used", "Model
OR minutes used", "", "Procedure Type"] + procedureTypes

    dashboard = pd.DataFrame(index=rows,
```

**Appendix 1** to Rozario D, Rozario N. Can machine learning optimize the efficiency of the operating room in the era of COVID19? *Can J Surg* 2020.

DOI: 10.1503/cjs.016520

*Online appendices are unedited and posted as supplied by the authors.*

```
columns=["A", "B", "C", ]

for r in rows:
    dashboard.at[r, "A"] = r

# -----
# Output basic stats
dashboard.at["", ""] = ""
dashboard.at["Number of days", "B"] = count
print("number of days: ", count)
dashboard.at["Number of cases", "B"] = len(rowExpectedTimes)

print("number of cases: ", len(rowExpectedTimes))
dashboard.at["Original overtime frequency", "B"] = round(currentOvertimeCount / count, 2)
print("current overtime frequency: %.0f%%" % (100 * currentOvertimeCount / count))
dashboard.at["Original undertime frequency", "B"] = round(currentUndertimeCount / count,
2)
print("current undertime frequency: %.0f%%" % (100 * currentUndertimeCount / count))
dashboard.at["Model overtime frequency", "B"] = round(solver.Value(overtimeCount) /
count, 2)
print("model overtime frequency: %.0f%%" % (100 * solver.Value(overtimeCount) / count))
dashboard.at["Model undertime frequency", "B"] = round(solver.Value(undertimeCount) /
count, 2)
print("model undertime frequency: %.0f%%" % (100 * solver.Value(undertimeCount) /
count))

# -----
# Output overtime minutes and overtime cost
originalOverMinutes = 0
modelOverMinutes = 0

originalCost = 0
modelCost = 0

for day in days:
    if solver.Value(totalScheduledTime[day]) < actualTotalTime[day]:
        modelOverMinutes += actualTotalTime[day] - solver.Value(totalScheduledTime[day])
        modelCost += math.ceil((actualTotalTime[day] -
solver.Value(totalScheduledTime[day])) / overtimeBlockLength) * noOfNursesPerBlock *
overtimeSalary
    if expectedTotalTime[day] < actualTotalTime[day]:
        originalOverMinutes += actualTotalTime[day] - expectedTotalTime[day]
        originalCost += math.ceil((actualTotalTime[day] - expectedTotalTime[day]) /
overtimeBlockLength) * noOfNursesPerBlock * overtimeSalary

print("Original overtime minutes used: ", originalOverMinutes)
```

**Appendix 1** to Rozario D, Rozario N. Can machine learning optimize the efficiency of the operating room in the era of COVID19? *Can J Surg* 2020.

DOI: 10.1503/cjs.016520

*Online appendices are unedited and posted as supplied by the authors.*

```
dashboard.at["Original Overtime Minutes Used", "B"] = originalOverMinutes
print("Model overtime minutes used: ", modelOverMinutes)
dashboard.at["Model Overtime Minutes Used", "B"] = modelOverMinutes

print("Original overtime cost: ", originalCost)
dashboard.at["Original Overtime Cost", "B"] = originalCost
print("Model overtime cost: ", modelCost)
dashboard.at["Model Overtime Cost", "B"] = modelCost

print("\n")

# -----
# Output original and machine learning scheduling times for each procedure
dashboard.at["Procedure Type", "B"] = "Original Time"
dashboard.at["Procedure Type", "C"] = "Machine Learning Time"
for p in procedureTypes:
    print(p + ": " + "%d" % solver.Value(procedureSchedulingTimes[p]))
    dashboard.at[p, "B"] = originalBookTimes[p]
    dashboard.at[p, "C"] = solver.Value(procedureSchedulingTimes[p])

# -----
# Output cases completed with model and OR minutes used by original and machine
learning methods
totalNoCases = 0
originalCases = 0
modelCases = 0
originalMinutes = 0
modelMinutes = 0
totalMinutes = 0

print("\n")
for day in days:
    noOfCases = len(actualTimes[day])
    totalNoCases += noOfCases

    originalMinutes += actualTotalTime[day]
    modelMinutes += solver.Value(totalScheduledTime[day])

    ORTime = 450 - (noOfCases - 1) * 15
    totalMinutes += ORTime

    originalTime = (ORTime - actualTotalTime[day])
    modelTime = (ORTime - solver.Value(totalScheduledTime[day]))
    originalCases += noOfCases
    if originalTime < 0:
        for i in reversed(range(len(actualTimes[day]))):
            originalTime += actualTimes[day][i]
```

**Appendix 1** to Rozario D, Rozario N. Can machine learning optimize the efficiency of the operating room in the era of COVID19? *Can J Surg* 2020.

DOI: 10.1503/cjs.016520

*Online appendices are unedited and posted as supplied by the authors.*

```
        originalCases -= 1
        if originalTime > 0:
            break
    modelCases += noOfCases
    if modelTime < 0:
        for i in reversed(range(len(actualTimes[day]))):
            modelTime += actualTimes[day][i]
            modelCases -= 1
            if modelTime > 0:
                break

    print("Cases achieved with machine learning model: %.0f%%" % (100 * modelCases /
totalNoCases))
    dashboard.at["Model cases achieved", "B"] = round(modelCases / totalNoCases, 2)
    print("OR minutes used with original model: %.0f%%" % (100 * originalMinutes /
totalMinutes))
    dashboard.at["Original OR minutes used", "B"] = round(originalMinutes / totalMinutes, 2)
    print("OR minutes used with machine learning model: %.0f%%" % (100 * modelMinutes /
totalMinutes))
    dashboard.at["Model OR minutes used", "B"] = round(modelMinutes / totalMinutes, 2)

    dashboard.to_excel(r'' + excelOutputFile, index=False)

else:

    print("No feasible solution found.")
```



**Appendix 1** to Rozario D, Rozario N. Can machine learning optimize the efficiency of the operating room in the era of COVID19? *Can J Surg* 2020.

DOI: 10.1503/cjs.016520

Online appendices are unedited and posted as supplied by the authors.

Surgery Division 1 2017 - 2019

|                                 | Surgeon 1 |            | Surgeon 2  |            | Surgeon 3  |            | Surgeon 4  |            | Surgeon 5  |            | Surgeon 6  |                  | Surgeon 7  |            |
|---------------------------------|-----------|------------|------------|------------|------------|------------|------------|------------|------------|------------|------------|------------------|------------|------------|
| Number of Days                  | 155       |            | 135        |            | 176        |            | 154        |            | 194        |            | 183        |                  | 140        |            |
| Number of Cases                 | 847       |            | 444        |            | 733        |            | 703        |            | 753        |            | 655        |                  | 567        |            |
| Machine Learning Cases Achieved | 99.00%    |            | 95.67%     |            | 94.67%     |            | 91.67%     |            | 91.33%     |            | 93.00%     |                  | 96.33%     |            |
|                                 | Original  | ML Model   | Original   | ML Model   | Original   | ML Model   | Original   | ML Model   | Original   | ML Model   | Original   | Machine Learning | Original   | ML Model   |
| Overtime Frequency              | 13.33%    | 21.33%     | 48.67%     | 20.67%     | 32.67%     | 21.67%     | 55.33%     | 28.00%     | 54.67%     | 22.33%     | 58.33%     | 25.00%           | 47.33%     | 27.67%     |
| Undertime Frequency             | 74.00%    | 17.00%     | 31.00%     | 13.00%     | 56.67%     | 14.33%     | 35.33%     | 10.00%     | 30.00%     | 24.67%     | 27.33%     | 15.33%           | 40.33%     | 10.67%     |
| Overtime Minutes Used           | 623       | 1586       | 2933       | 2127       | 2200       | 2825       | 3926       | 2525       | 4997       | 3303       | 5041       | 2525             | 3066       | 2757       |
| Overtime Cost                   | \$9937.50 | \$26250.00 | \$42750.00 | \$32437.50 | \$33375.00 | \$42000.00 | \$56812.50 | \$39187.50 | \$72000.00 | \$48562.50 | \$73312.50 | \$39750.00       | \$44625.00 | \$40312.50 |
| Percentage of OR Minutes Used   | 75.00%    | 76.33%     | 71.67%     | 71.67%     | 73.67%     | 73.00%     | 88.33%     | 86.67%     | 81.67%     | 83.00%     | 76.67%     | 77.00%           | 76.67%     | 74.67%     |
|                                 |           |            |            |            |            |            |            |            |            |            |            |                  |            |            |
| Scheduling Times (mins)         |           |            |            |            |            |            |            |            |            |            |            |                  |            |            |
| Procedure 1                     | 55        | 56         |            |            |            |            |            |            |            |            |            |                  |            |            |
| Procedure 2                     | 60        | 61         | 60         | 71         | 52         | 59         | 88         | 114        | 74         | 86         | 68         | 63               | 74         | 66         |
| Procedure 3                     |           |            | 53         | 64         |            |            |            |            |            |            |            |                  |            |            |
| Procedure 4                     |           |            |            |            |            |            |            |            | 94         | 112        |            |                  | 106        | 103        |
| Procedure 5                     |           |            | 86         | 64         |            |            |            |            |            |            |            |                  |            |            |
| Procedure 6                     |           |            | 102        | 96         | 78         | 78         |            |            |            |            |            |                  |            |            |
| Procedure 7                     |           |            |            |            |            |            |            |            |            |            | 157        | 143              |            |            |
| Procedure 8                     | 139       | 125        |            |            |            |            |            |            | 205        | 262        |            |                  |            |            |
| Procedure 9                     |           |            | 170        | 176        | 173        | 143        |            |            | 174        | 160        |            |                  | 169        | 154        |
| Procedure 10                    | 54        | 54         | 69         | 73         | 62         | 66         | 70         | 63         | 73         | 68         | 86         | 81               | 70         | 76         |
| Procedure 11                    | 50        | 37         |            |            |            |            | 55         | 56         | 65         | 70         | 65         | 57               | 46         | 37         |
| Procedure 12                    |           |            |            |            |            |            |            |            | 94         | 111        |            |                  |            |            |
| Procedure 13                    | 80        | 74         |            |            |            |            |            |            |            |            |            |                  |            |            |
| Procedure 14                    | 50        | 40         | 61         | 64         | 60         | 57         | 70         | 71         | 62         | 70         | 78         | 81               | 62         | 65         |
| Procedure 15                    |           |            |            |            |            |            | 35         | 37         |            |            |            |                  |            |            |
| Procedure 16                    |           |            |            |            |            |            | 58         | 72         |            |            |            |                  |            |            |
| Procedure 17                    |           |            |            |            | 31         | 24         |            |            |            |            |            |                  |            |            |
| Procedure 18                    |           |            |            |            | 31         | 24         |            |            |            |            |            |                  |            |            |
| Procedure 19                    |           |            |            |            |            |            | 48         | 58         |            |            |            |                  |            |            |
| Procedure 20                    | 58        | 60         |            |            |            |            | 92         | 91         | 96         | 100        | 100        | 109              | 78         | 80         |
| Procedure 21                    |           |            | 112        | 135        | 111        | 70         |            |            |            |            |            |                  |            |            |
| Procedure 22                    |           |            | 72         | 82         |            |            | 72         | 62         |            |            |            |                  |            |            |
| Procedure 23                    | 45        | 34         |            |            |            |            |            |            |            |            | 57         | 58               | 44         | 42         |
| Procedure 24                    | 45        | 36         | 65         | 47         | 44         | 51         | 61         | 59         | 51         | 59         | 53         | 54               | 48         | 44         |
| Procedure 25                    |           |            |            |            |            |            |            |            |            |            | 25         | 39               |            |            |

*Online appendices are unedited and posted as supplied by the authors.*

|              |  |  |  |  |    |    |  |  |  |  |    |    |    |    |
|--------------|--|--|--|--|----|----|--|--|--|--|----|----|----|----|
| Procedure 26 |  |  |  |  | 37 | 35 |  |  |  |  | 46 | 46 | 37 | 33 |
|--------------|--|--|--|--|----|----|--|--|--|--|----|----|----|----|

**Appendix 1** to Rozario D, Rozario N. Can machine learning optimize the efficiency of the operating room in the era of COVID19? *Can J Surg* 2020.

DOI: 10.1503/cjs.016520

Online appendices are unedited and posted as supplied by the authors.

Surgery Division 2 2017 - 2019

|                                 | Surgeon 1  |            | Surgeon 2  |            | Surgeon 3  |            | Surgeon 4  |            | Surgeon 5  |            | Surgeon 6  |            | Surgeon 7  |            | Surgeon 8   |            |
|---------------------------------|------------|------------|------------|------------|------------|------------|------------|------------|------------|------------|------------|------------|------------|------------|-------------|------------|
| Number of Days                  | 201        |            | 230        |            | 232        |            | 308        |            | 253        |            | 70         |            | 304        |            | 240         |            |
| Number of Cases                 | 946        |            | 758        |            | 552        |            | 1161       |            | 879        |            | 173        |            | 821        |            | 561         |            |
| Machine Learning Cases Achieved | 99.00%     |            | 99.33%     |            | 99.33%     |            | 100.00%    |            | 98.67%     |            | 97.00%     |            | 100.00%    |            | 95.00%      |            |
|                                 | Original   | ML Model   | Original    | ML Model   |
| Overtime Frequency              | 45.67%     | 29.00%     | 46.00%     | 27.67%     | 36.33%     | 25.00%     | 57.33%     | 38.00%     | 55.67%     | 31.33%     | 53.00%     | 29.00%     | 49.33%     | 34.67%     | 62.67%      | 19.67%     |
| Undertime Frequency             | 33.67%     | 20.33%     | 32.67%     | 18.00%     | 45.00%     | 19.00%     | 19.33%     | 19.67%     | 31.67%     | 19.00%     | 33.00%     | 19.00%     | 30.00%     | 21.67%     | 22.33%      | 23.33%     |
| Overtime Minutes Used           | 2121       | 1850       | 2481       | 2027       | 2379       | 2093       | 3449       | 2852       | 4738       | 3311       | 1626       | 986        | 3079       | 2965       | 7980        | 4558       |
| Overtime Cost                   | \$35062.50 | \$30562.50 | \$41250.00 | \$35812.50 | \$38625.00 | \$34312.50 | \$60187.50 | \$48562.50 | \$72562.50 | \$52312.50 | \$23437.50 | \$15562.50 | \$53250.00 | \$48750.00 | \$113250.00 | \$68250.00 |
| Percentage of OR Minutes Used   | 80.67%     | 81.00%     | 81.33%     | 82.00%     | 58.33%     | 58.67%     | 62.00%     | 62.00%     | 77.33%     | 77.33%     | 61.00%     | 60.00%     | 59.33%     | 60.00%     | 59.67%      | 61.67%     |
|                                 |            |            |            |            |            |            |            |            |            |            |            |            |            |            |             |            |
| Scheduling Times (mins)         |            |            |            |            |            |            |            |            |            |            |            |            |            |            |             |            |
| Procedure 1                     |            |            | 115        | 117        | 124        | 108        | 76         | 77         | 87         | 80         | 110        | 118        | 91         | 102        |             |            |
| Procedure 2                     | 151        | 121        |            |            |            |            |            |            |            |            |            |            |            |            |             |            |
| Procedure 3                     |            |            |            |            |            |            |            |            |            |            | 132        | 55         |            |            | 129         | 119        |
| Procedure 4                     | 87         | 78         |            |            |            |            |            |            |            |            |            |            |            |            |             |            |
| Procedure 5                     | 115        | 104        |            |            |            |            |            |            |            |            |            |            |            |            |             |            |
| Procedure 6                     |            |            |            |            | 55         | 71         | 50         | 55         |            |            | 50         | 72         | 55         | 49         |             |            |
| Procedure 7                     |            |            |            |            |            |            |            |            |            |            |            |            |            |            | 59          | 56         |
| Procedure 8                     | 94         | 93         |            |            |            |            |            |            |            |            |            |            |            |            |             |            |
| Procedure 9                     |            |            |            |            |            |            |            |            | 33         | 40         |            |            |            |            |             |            |
| Procedure 10                    |            |            |            |            | 190        | 163        | 142        | 120        | 131        | 130        |            |            | 142        | 133        |             |            |
| Procedure 11                    |            |            |            |            |            |            |            |            |            |            |            |            |            |            | 133         | 186        |
| Procedure 12                    |            |            | 143        | 128        |            |            |            |            |            |            |            |            |            |            |             |            |
| Procedure 13                    | 116        | 111        |            |            |            |            |            |            |            |            |            |            |            |            | 120         | 171        |
| Procedure 14                    |            |            | 113        | 114        |            |            |            |            |            |            |            |            |            |            |             |            |
| Procedure 15                    |            |            |            |            | 137        | 137        | 94         | 94         | 123        | 130        |            |            | 107        | 100        |             |            |
| Procedure 16                    |            |            |            |            |            |            |            |            |            |            |            |            | 118        | 121        |             |            |
| Procedure 17                    |            |            | 145        | 138        |            |            |            |            |            |            |            |            |            |            |             |            |
| Procedure 18                    | 91         | 98         | 133        | 125        |            |            |            |            |            |            |            |            |            |            |             |            |
| Procedure 19                    |            |            |            |            |            |            |            |            | 113        | 115        |            |            |            |            |             |            |
| Procedure 20                    |            |            |            |            |            |            |            |            |            |            |            |            |            |            | 118         | 118        |
| Procedure 21                    |            |            | 105        | 104        |            |            |            |            |            |            |            |            |            |            |             |            |
| Procedure 22                    | 132        | 109        |            |            |            |            |            |            |            |            |            |            |            |            |             |            |
| Procedure 23                    |            |            |            |            |            |            |            |            | 37         | 40         |            |            | 40         | 58         |             |            |
| Procedure 24                    |            |            | 114        | 114        |            |            |            |            |            |            | 128        | 127        |            |            |             |            |
| Procedure 25                    |            |            |            |            | 88         | 125        |            |            |            |            |            |            |            |            |             |            |
| Procedure 26                    |            |            |            |            | 82         | 81         |            |            |            |            | 92         | 75         |            |            | 99          | 108        |
| Procedure 27                    |            |            |            |            |            |            | 103        | 80         |            |            |            |            |            |            |             |            |
| Procedure 28                    |            |            |            |            |            |            |            |            |            |            | 90         | 122        |            |            | 92          | 150        |
| Procedure 29                    |            |            | 106        | 122        |            |            |            |            |            |            |            |            |            |            |             |            |
| Procedure 30                    | 106        | 102        | 117        | 113        | 138        | 122        | 111        | 101        |            |            | 111        | 96         |            |            |             |            |
| Procedure 31                    |            |            |            |            |            |            |            |            |            |            | 85         | 115        |            |            |             |            |
| Procedure 32                    |            |            |            |            |            |            |            |            |            |            |            |            |            |            | 119         | 120        |
| Procedure 33                    |            |            |            |            |            |            |            |            | 152        | 162        |            |            |            |            |             |            |
| Procedure 34                    | 36         | 35         | 43         | 48         | 50         | 49         | 32         | 36         | 54         | 60         | 44         | 92         | 38         | 40         | 72          | 95         |
| Procedure 35                    |            |            |            |            | 93         | 98         | 95         | 82         | 90         | 139        | 75         | 127        | 105        | 75         | 108         | 126        |

Online appendices are unedited and posted as supplied by the authors.

|              |    |    |  |  |    |    |     |    |     |     |  |  |     |     |  |  |
|--------------|----|----|--|--|----|----|-----|----|-----|-----|--|--|-----|-----|--|--|
| Procedure 36 |    |    |  |  |    |    | 130 | 97 | 139 | 125 |  |  | 137 | 144 |  |  |
| Procedure 37 | 54 | 52 |  |  | 60 | 50 | 85  | 93 |     |     |  |  | 47  | 51  |  |  |
